# Supplementary material
Source: publisher figshare collection journal article supplement (https://sage.figshare.com/ndownloader/files/14746712)
Supplement: Supplementary file 1 [file 14746712]

**Table 4. Glucose-dependent insulintropic peptide (GIP; pmol/L)**

|                             | <b>100-300<math>\mu</math></b> | <b>300-500<math>\mu</math></b> | <b>Sham</b>       | <b>100-300<math>\mu</math><br/>vs.<br/>300-500<math>\mu</math> (<i>p</i>)</b> | <b>100-300<math>\mu</math><br/>vs.<br/>Sham (<i>p</i>)</b> | <b>300-500<math>\mu</math><br/>vs.<br/>Sham (<i>p</i>)</b> |
|-----------------------------|--------------------------------|--------------------------------|-------------------|-------------------------------------------------------------------------------|------------------------------------------------------------|------------------------------------------------------------|
| <b>T0</b>                   | 72.69 $\pm$ 51.57              | 37.54 $\pm$ 36.44              | 58.31 $\pm$ 50.81 | 0.42                                                                          | 0.38                                                       | 0.37                                                       |
| <b>T1</b>                   | 98.79 $\pm$ 15.05              | 68.71 $\pm$ 76.31              | 94.99 $\pm$ 41.60 | 0.42                                                                          | 0.43                                                       | 0.47                                                       |
| <b>T2</b>                   | 73.16 $\pm$ 45.10              | 50.95 $\pm$ 34.52              | 68.67 $\pm$ 58.91 | <b>0.03</b>                                                                   | 0.48                                                       | 0.35                                                       |
| <b>T3</b>                   | 58.14 $\pm$ 17.60              | 28.22 $\pm$ 14.93              | 71.44 $\pm$ 30.28 | 0.09                                                                          | 0.26                                                       | 0.06                                                       |
| <b>T4</b>                   | 63.69 $\pm$ 5.98               | 36.64 $\pm$ 10.88              | 77.54 $\pm$ 39.35 | 0.13                                                                          | 0.26                                                       | 0.14                                                       |
| <b>T0 vs. T1 (<i>p</i>)</b> | 0.18                           | 0.43                           | 0.15              |                                                                               |                                                            |                                                            |
| <b>T0 vs. T2 (<i>p</i>)</b> | 0.49                           | 0.28                           | 0.4               |                                                                               |                                                            |                                                            |
| <b>T0 vs. T3 (<i>p</i>)</b> | 0.3                            | 0.14                           | 0.35              |                                                                               |                                                            |                                                            |
| <b>T0 vs. T4 (<i>p</i>)</b> | 0.2                            | 0.18                           | 0.3               |                                                                               |                                                            |                                                            |
| <b>T2 vs. T3 (<i>p</i>)</b> | 0.29                           | 0.13                           | 0.47              |                                                                               |                                                            |                                                            |
| <b>T2 vs. T4 (<i>p</i>)</b> | 0.2                            | 0.22                           | 0.41              |                                                                               |                                                            |                                                            |
| <b>T3 vs. T4 (<i>p</i>)</b> | 0.35                           | 0.19                           | 0.42              |                                                                               |                                                            |                                                            |

GIP levels are expressed in pmol/L. T0= before embolization; T1= after 1 hour; T2= after 1 month; T3= after 3 months; T4= after 6 months. Data are expressed as mean  $\pm$  SD (standard deviation). A *p* value <0.05 was considered statistically significant.
